# Supplementary material
Source: PubMed Central journal article supplement (PMC4039204)
Supplement: NIHMS582250-supplement-Table_S1-S3__Fig__S1-S5.pdf [file NIHMS582250-supplement-Table_S1-S3__Fig__S1-S5.pdf]

## **Supplemental Information**

### **The substrate binding interface of alkylpurine DNA glycosylase AlkD**

Elwood A. Mullins,<sup>1</sup> Emily H. Rubinson,<sup>1,2</sup> and Brandt F. Eichman\*

## Supplemental Tables

| Table S1. DNA binding by wild-type and mutant AlkD <sup>a</sup> |                       |                   |                       |                   |                         |                   |
|-----------------------------------------------------------------|-----------------------|-------------------|-----------------------|-------------------|-------------------------|-------------------|
| Enzyme                                                          | $K_d$                 |                   |                       |                   |                         |                   |
|                                                                 | G•C-DNA<br>( $\mu$ M) | Relative<br>to WT | G•T-DNA<br>( $\mu$ M) | Relative<br>to WT | THF•C-DNA<br>( $\mu$ M) | Relative<br>to WT |
| WT                                                              | 1.3 $\pm$ 0.2         | 1.0               | 1.4 $\pm$ 0.3         | 1.0               | 2.8 $\pm$ 0.8           | 1.0               |
| Y27A                                                            | 1.5 $\pm$ 0.3         | 1.1               | 3.0 $\pm$ 0.5         | 2.1               | 4.6 $\pm$ 0.6           | 1.6               |
| Y27F                                                            | 1.5 $\pm$ 0.1         | 1.1               | 1.4 $\pm$ 0.3         | 1.0               | 2.9 $\pm$ 0.6           | 1.0               |
| Q38E                                                            | 3.0 $\pm$ 0.3         | 2.3               | 3.8 $\pm$ 0.3         | 2.7               | 7.6 $\pm$ 1.2           | 2.7               |
| T39D                                                            | 6.4 $\pm$ 1.1         | 4.9               | 3.1 $\pm$ 0.7         | 2.2               | 11.4 $\pm$ 2.8          | 4.1               |
| R43E                                                            | 12.8 $\pm$ 0.2        | 9.8               | 14.7 $\pm$ 2.0        | 10.5              | 13.5 $\pm$ 4.1          | 4.8               |
| W109A                                                           | 3.7 $\pm$ 1.2         | 2.8               | 2.2 $\pm$ 0.1         | 1.6               | 4.3 $\pm$ 0.6           | 1.5               |
| D113N                                                           | 0.7 $\pm$ 0.1         | 0.5               | 1.0 $\pm$ 0.1         | 0.7               | 1.3 $\pm$ 0.1           | 0.5               |
| R148A                                                           | 4.6 $\pm$ 0.8         | 3.5               | 3.9 $\pm$ 0.6         | 2.8               | 6.9 $\pm$ 3.0           | 2.5               |
| F179A/F180A                                                     | 2.4 $\pm$ 0.5         | 1.8               | 2.3 $\pm$ 0.9         | 1.6               | 4.7 $\pm$ 1.1           | 1.7               |
| W187A                                                           | 3.6 $\pm$ 0.7         | 2.8               | 4.7 $\pm$ 0.5         | 3.4               | 7.6 $\pm$ 0.9           | 2.7               |
| R190A                                                           | 0.8 $\pm$ 0.1         | 0.6               | 1.1 $\pm$ 0.2         | 0.8               | 1.3 $\pm$ 0.1           | 0.5               |

<sup>a</sup> Dissociation constants ( $K_d$ ) for AlkD binding to 25-mer oligonucleotide duplexes containing the specified modification as measured by fluorescence anisotropy. Binding was performed at 25°C, pH 6.5, and 120 mM ionic strength. Values represent the averages and standard deviations from three experiments.

| <b>Table S2.</b> Excision of 7mG from oligonucleotide DNA by wild-type and mutant AlkD <sup>a</sup> |                                                    |                      |
|-----------------------------------------------------------------------------------------------------|----------------------------------------------------|----------------------|
| Enzyme                                                                                              | $k_{\text{obs}}$ ( $\text{M}^{-1} \text{s}^{-1}$ ) | Relative to WT       |
| WT                                                                                                  | $(1.2 \pm 0.2) \times 10^3$                        | $1.0 \times 10^0$    |
| Y27A                                                                                                | $(1.5 \pm 0.1) \times 10^2$                        | $1.3 \times 10^{-1}$ |
| Y27F                                                                                                | $(4.6 \pm 1.8) \times 10^2$                        | $3.8 \times 10^{-1}$ |
| Q38E                                                                                                | $(3.3 \pm 1.1) \times 10^2$                        | $2.8 \times 10^{-1}$ |
| T39D                                                                                                | $(1.1 \pm 0.6) \times 10^1$                        | $9.2 \times 10^{-3}$ |
| R43E                                                                                                | $(3.4 \pm 0.6) \times 10^1$                        | $2.8 \times 10^{-2}$ |
| W109A                                                                                               | $(4.1 \pm 1.2) \times 10^0$                        | $3.4 \times 10^{-3}$ |
| D113N                                                                                               | $(5.8 \pm 0.2) \times 10^1$                        | $4.8 \times 10^{-2}$ |
| D113N (25°C) <sup>b</sup>                                                                           | $(1.3 \pm 4.3) \times 10^0$                        | $1.1 \times 10^{-3}$ |
| R148A                                                                                               | $(1.0 \pm 0.1) \times 10^1$                        | $9.2 \times 10^{-3}$ |
| F179A/F180A                                                                                         | $(3.2 \pm 0.1) \times 10^1$                        | $2.7 \times 10^{-2}$ |
| W187A                                                                                               | $(1.6 \pm 0.1) \times 10^1$                        | $1.3 \times 10^{-2}$ |
| R190A                                                                                               | $(3.4 \pm 0.5) \times 10^0$                        | $2.8 \times 10^{-3}$ |
| No enzyme                                                                                           | $(1.4 \pm 0.6) \times 10^{-1}$                     | $1.2 \times 10^{-4}$ |

<sup>a</sup> Second-order rate constants for excision of 7mG from a 25-mer oligonucleotide duplex. Reactions were performed at 37°C (unless otherwise noted), pH 7.5, and 150 mM ionic strength. Values represent the averages and standard deviations from three experiments.

<sup>b</sup> Reactions were performed at 25°C.

| Enzyme                    | Adduct released |                |            |                |
|---------------------------|-----------------|----------------|------------|----------------|
|                           | 3mA (pmol)      | Relative to WT | 7mG (pmol) | Relative to WT |
| HCl                       | 66.9 ± 8.0      | 0.96           | 352 ± 40   | 1.32           |
| WT                        | 69.7 ± 3.3      | 1.00           | 266 ± 3    | 1.00           |
| Y27A                      | 66.3 ± 3.4      | 0.95           | 190 ± 9    | 0.71           |
| Y27F                      | 71.0 ± 2.1      | 1.02           | 277 ± 5    | 1.04           |
| Q38E                      | 67.5 ± 1.0      | 0.97           | 230 ± 3    | 0.86           |
| T39D                      | 66.5 ± 3.2      | 0.95           | 107 ± 4    | 0.40           |
| R43E                      | 65.3 ± 2.3      | 0.94           | 179 ± 4    | 0.67           |
| W109A                     | 28.4 ± 1.2      | 0.41           | 33.0 ± 0.7 | 0.12           |
| D113N                     | 30.5 ± 1.8      | 0.44           | 21.0 ± 0.2 | 0.08           |
| D113N (25°C) <sup>b</sup> | 19.2 ± 1.1      | 0.28           | 12.3 ± 0.3 | 0.05           |
| R148A                     | 45.6 ± 1.0      | 0.65           | 14.6 ± 0.1 | 0.05           |
| F179A/F180A               | 66.3 ± 2.2      | 0.95           | 81.7 ± 0.6 | 0.31           |
| W187A                     | 53.9 ± 0.2      | 0.77           | 24.3 ± 0.3 | 0.09           |
| R190A                     | 62.9 ± 1.2      | 0.90           | 57.2 ± 0.4 | 0.22           |
| No enzyme                 | 1.90 ± 0.18     | 0.03           | 10.1 ± 0.1 | 0.04           |

<sup>a</sup> Adducts released from 10 µg methylated calf thymus DNA by 5 µM enzyme, 5 N HCl, or glycosylase buffer. Reactions were carried out at 37°C (unless otherwise noted), pH 7.5, and 150 mM ionic strength. Values represent the averages and standard deviations from three experiments.

<sup>b</sup> Reactions were carried out at 25°C.

## Supplemental Figures

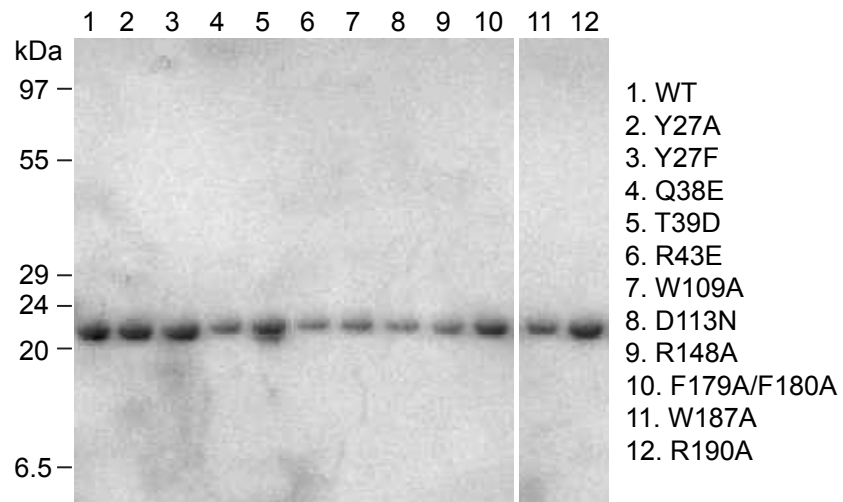

**Figure S1. SDS-PAGE analysis of purified wild-type and mutant AlkD.**

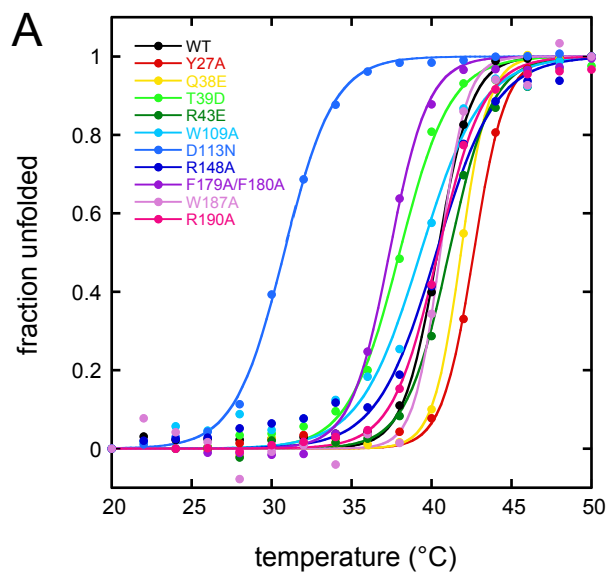

**B**

| Enzyme      | $T_m$ ( $^{\circ}\text{C}$ ) |
|-------------|------------------------------|
| WT          | 40.4                         |
| Y27A        | 42.6                         |
| Y27F        | ND*                          |
| Q38E        | 41.8                         |
| T39D        | 38.0                         |
| R43E        | 41.1                         |
| W109A       | 39.3                         |
| D113N       | 30.7                         |
| R148A       | 40.3                         |
| F179A/F180A | 37.4                         |
| W187A       | 40.5                         |
| R190A       | 40.4                         |

\*not determined

**Figure S2. Thermal denaturation of wild-type and mutant AlkD.** (A) Thermal melting profiles. Protein unfolding was monitored by changes in molar ellipticity at 222 nm during heating. (B) Melting temperatures ( $T_m$ ) derived from panel A.

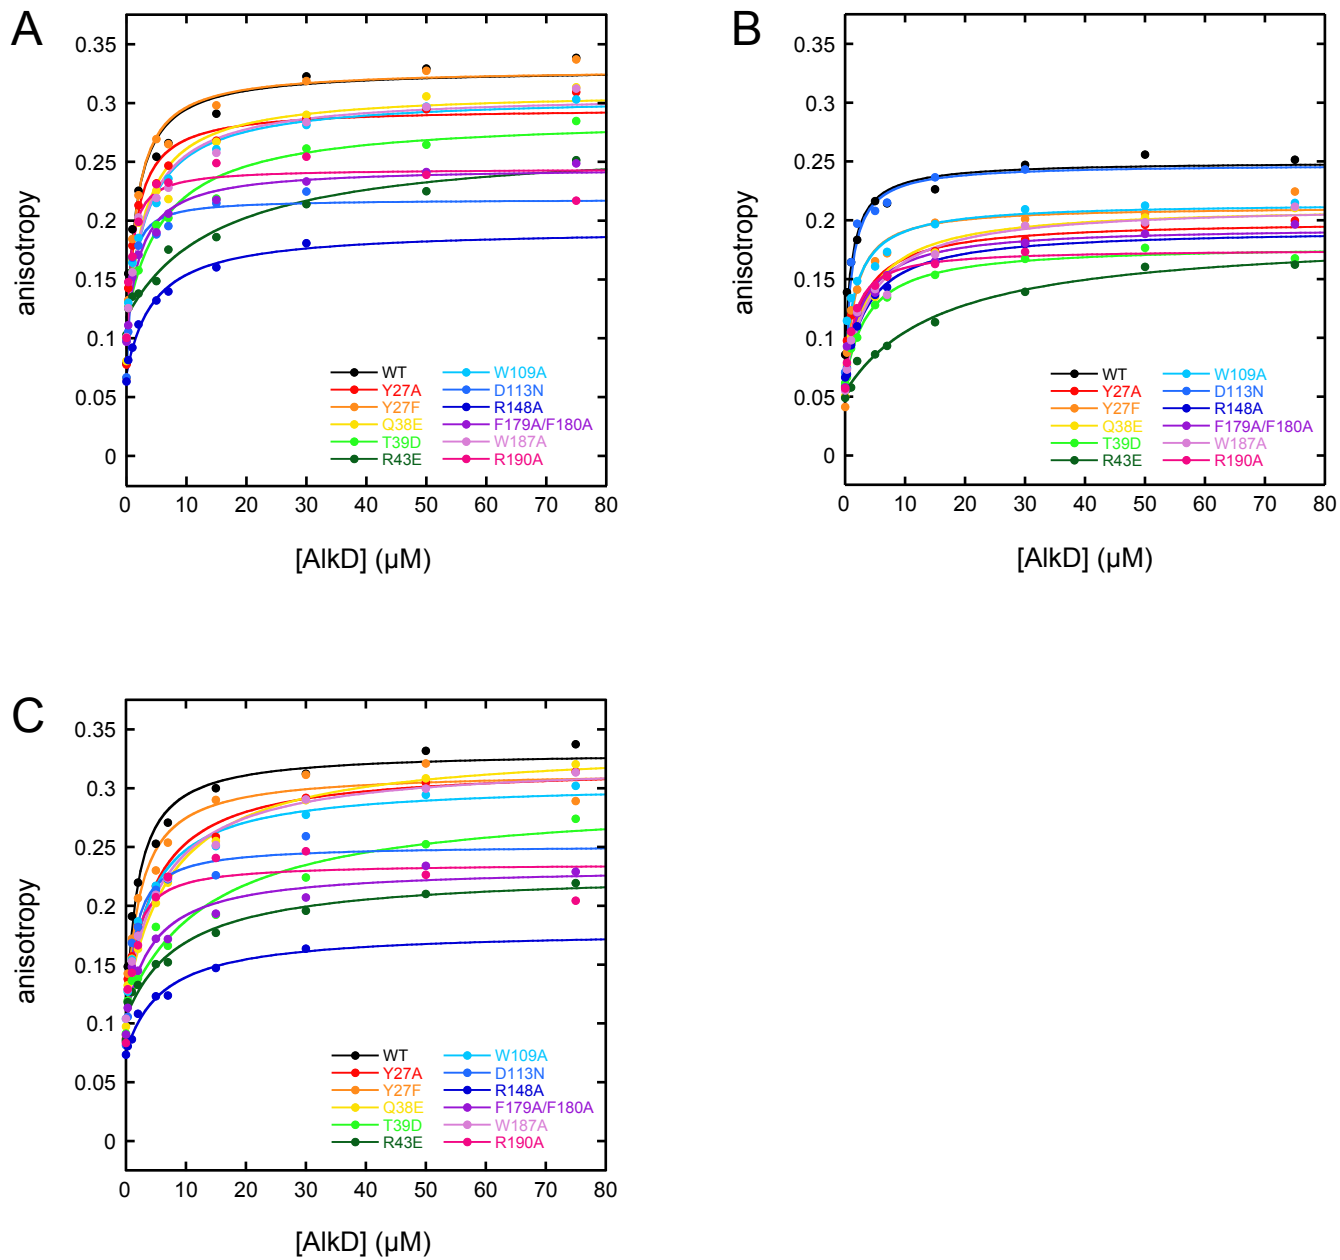

**Figure S3. DNA binding by wild-type and mutant AlkD.** Binding of FAM-labeled DNA by wild-type and mutant AlkD was measured using fluorescence anisotropy. 25-mer oligonucleotides contained a centrally located (A) G•C, (B) G•T, or (C) THF•C. Equilibrium dissociation constants are provided in Table S1.

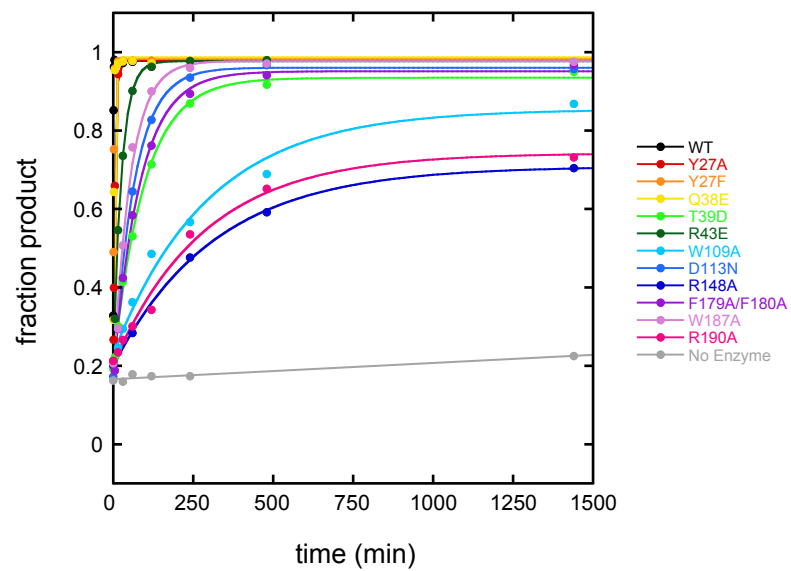

**Figure S4. 7mG excision from oligonucleotide DNA by wild-type and mutant AlkD.** Second-order rate constants are provided in Table S2.



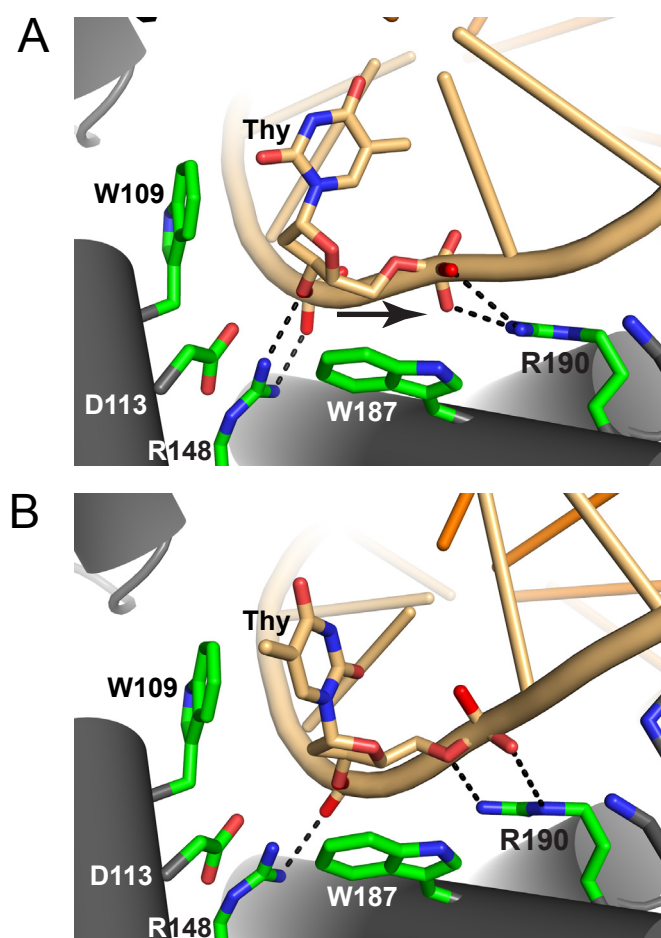

**Figure S5. Changes in AlkD-DNA contacts to accommodate the distorted THF-DNA conformation.** (A) Substrate-like complex containing 3-deaza-*N*3-methyladenine (3d3mA). (B) Product-like complex containing tetrahydrofuran (THF). The thymine (Thy) opposite the lesion and side chains lining the concave binding surface (green) are shown as sticks. The black arrow denotes the movement of the thymine backbone necessary to attain the conformation observed in the product-like complex.
